# Supplementary material for: Chronic dehydration induces injury pathways in rats, but does not mimic histopathology of chronic interstitial nephritis in agricultural communities
Source: PubMed Central journal article supplement (PMC10593944; doi:10.1038/s41598-023-43567-z), 2023-10-23

## **Supplementary Tables**

### **Table of Contents**

Table S1: Differentially expressed renal proteins in response to dehydration protocols

Table S2: Differentially expressed renal proteins in response to cyclosporine treatment

Table S3: Venn diagram analysis of differentially expressed renal proteins in response to either dehydration or cyclosporine treatment

Table S4: Gene Ontology-based interpretation of dehydration-induced proteomic perturbations

Table S5: Gene Ontology-based interpretation of cyclosporine-induced proteomic perturbations

Table S6: Ingenuity Canonical Signaling Pathway Analysis comparison of renal proteomic responses to dehydration or cyclosporine treatment

Table S7: Overlapping of dehydration- and cyclosporine exposure DEPs with a literature-derived protein list

Table S8: Ingenuity Disease/Bio-Function comparison analysis of renal proteomic responses to dehydration or cyclosporine treatment

Table S9: Ingenuity Toxicity Function analysis of renal proteomic responses to dehydration

Table S10: Ingenuity Toxicity Function analysis of renal proteomic responses to cyclosporine treatment

Table S11: Heatmaps of Gene Symbol-Biomedical Text word correlations using input DEP lists from the dehydration cohort showing associated text matrices revealing a clustering of proteins with biomedical terms.

Table S12: Heatmaps of Gene Symbol-Biomedical Text word correlations using input DEP lists from the cyclosporine cohort showing associated text matrices revealing a clustering of proteins with biomedical terms.

**Table S1.** Differentially expressed renal proteins in response to dehydration protocols. Proteins that demonstrated a significant ( $p < 0.05$ ) deviation from background expression levels, when comparing samples from dehydrated animals compared to controls are depicted in the table. For each differentially regulated protein the Uniprot accession #, description, official Gene Symbol and the  $\log_2$  transformed expression ratio (Dehydration:Control) is given.

| Accession # | Protein Description                                  | Gene Symbol  | Dehydration:Control (Log2) |
|-------------|------------------------------------------------------|--------------|----------------------------|
| Q62669      | Globin a1                                            | LOC103694855 | 0.696260912                |
| A0A0G2K7W6  | Uncharacterized protein                              | RGD1562402   | 0.626260912                |
| P20760      | Ig gamma-2A chain C region                           | Igg-2a       | 0.536260912                |
| A0A0G2JSV6  | Globin c2                                            | Hba-a2       | 0.446260912                |
| A0A0G2JSW3  | Globin a4                                            | Hbb          | 0.446260912                |
| P11517      | Hemoglobin subunit beta-2                            | Hbb2         | 0.436260912                |
| P14046      | Alpha-1-inhibitor 3                                  | Al13         | 0.326260912                |
| A0A0G2JSH5  | Serum albumin                                        | Alb          | 0.316260912                |
| E9PU64      | Scinderin                                            | Scin         | 0.306260912                |
| Q5XIE6      | 3-hydroxyisobutyryl-CoA hydrolase, mitochondrial     | Hibch        | 0.306260912                |
| B1WBW2      | RWD domain-containing 2B                             | Rwdd2b       | 0.306260912                |
| P70583      | Deoxyuridine 5'-triphosphate nucleotidohydrolase     | Dut          | 0.306260912                |
| Q63041      | Alpha-1-macroglobulin                                | Al1m         | 0.296260912                |
| B0BNN3      | Carbonic anhydrase 1                                 | Ca1          | 0.296260912                |
| B2GV74      | Kinesin light chain 2                                | Klc2         | 0.286260912                |
| Q03336      | Regucalcin                                           | Rgn          | 0.286260912                |
| P14668      | Annexin A5                                           | Anxa5        | 0.266260912                |
| D4A833      | Mitochondrial ribosomal protein S30                  | Mrps30       | 0.266260912                |
| P06686      | Sodium/potassium-transporting ATPase subunit alpha-2 | Atp1a2       | 0.266260912                |
| F8WFT7      | Anion exchange protein                               | Slc4a1       | 0.266260912                |
| P23928      | Alpha-crystallin B chain                             | Cryab        | 0.266260912                |
| D3ZAS9      | DDRGK domain-containing 1                            | Ddrk1        | 0.256260912                |
| D3ZPY8      | Aldo-keto reductase family 1, member C13             | Akr1c13      | 0.256260912                |
| P08934      | Kininogen-1                                          | Kng1         | 0.236260912                |
| A0A0G2JW12  | Complement component 4A (Rodgers blood group)        | C4a          | 0.236260912                |
| Q63356      | Unconventional myosin-Ie                             | Myo1e        | 0.236260912                |
| Q9WTQ2      | Podocalyxin                                          | Podxl        | 0.236260912                |
| D3ZAF6      | ATP synthase subunit f, mitochondrial                | Atp5j2       | 0.236260912                |
| F1LPQ6      | Uncharacterized protein                              | Ighm         | 0.236260912                |
| M0R3Z8      | RCG28930, isoform CRA b                              | Rbm15        | 0.226260912                |
| Q4V7C6      | GMP synthase [glutamine-hydrolyzing]                 | Gmps         | 0.226260912                |
| A0A0G2K8V5  | C-reactive protein                                   | Crp          | 0.226260912                |
| P13697      | NADP-dependent malic enzyme                          | Me1          | 0.226260912                |
| Q01984      | Histamine N-methyltransferase                        | Hnmt         | 0.226260912                |
| P05964      | Protein S100-A6                                      | S100a6       | 0.216260912                |
| A0A0G2K654  | Histone cluster 1 H1 family member c                 | Hist1h1c     | 0.216260912                |

|            |                                                                                               |              |              |
|------------|-----------------------------------------------------------------------------------------------|--------------|--------------|
| A0A0G2K227 | Transporter                                                                                   | Slc6a6       | 0.216260912  |
| P14841     | Cystatin-C                                                                                    | Cst3         | -0.213739088 |
| D3ZTR5     | RCG21454                                                                                      | Zbed5        | -0.213739088 |
| C7E1V1     | Inositol 1,4,5-trisphosphate receptor type 3                                                  | Itpr3        | -0.213739088 |
| P05503     | Cytochrome c oxidase subunit 1                                                                | Mtco1        | -0.213739088 |
| Q5XIP9     | Transmembrane protein 43                                                                      | Tmem43       | -0.213739088 |
| Q6AYI2     | Kelch domain-containing protein 3                                                             | Klhdc3       | -0.223739088 |
| F1LTJ5     | Uncharacterized protein                                                                       | F1LTJ5       | -0.223739088 |
| Q5XIC2     | Evolutionarily conserved signaling intermediate in Toll pathway, mitochondrial                | Ecsit        | -0.223739088 |
| P53042     | Serine/threonine-protein phosphatase 5                                                        | Ppp5c        | -0.223739088 |
| M0RAP5     | SET-binding factor 1                                                                          | Sbf1         | -0.233739088 |
| D4A3E1     | Heterogeneous nuclear ribonucleoprotein L-like                                                | Hnrnp11      | -0.233739088 |
| A0A0G2K0P5 | Thyroid hormone receptor interactor 4                                                         | Trip4        | -0.233739088 |
| Q03344     | ATPase inhibitor, mitochondrial                                                               | Atpif1       | -0.233739088 |
| B5DFJ4     | VPS18 CORVET/HOPS core subunit                                                                | Vps18        | -0.233739088 |
| Q5M876     | N-acyl-aromatic-L-amino acid amidohydrolase (carboxylate-forming)                             | Acy3         | -0.233739088 |
| P02761     | Major urinary protein                                                                         | Mup          | -0.233739088 |
| M0R8V0     | UHRF1-binding protein 1-like                                                                  | LOC100910056 | -0.243739088 |
| D3ZZ38     | Sorting nexin                                                                                 | Snx18        | -0.243739088 |
| P18445     | 60S ribosomal protein L27a                                                                    | Rpl27a       | -0.243739088 |
| P18297     | Sepiapterin reductase                                                                         | Spr          | -0.243739088 |
| Q6IN37     | GM2 ganglioside activator                                                                     | Gm2a         | -0.253739088 |
| O54772     | SWI/SNF-related matrix-associated actin-dependent regulator of chromatin subfamily D member 2 | Smarcd2      | -0.253739088 |
| F7ES73     | Negative regulator of ubiquitin-like proteins 1                                               | Nub1         | -0.253739088 |
| A0A0G2K0V3 | 3'(2'),5'-bisphosphate nucleotidase 1                                                         | Bpnt1        | -0.253739088 |
| B1PLB1     | CD34 antigen (Predicted)                                                                      | Cd34         | -0.253739088 |
| Q3MID4     | Carbohydrate kinase-like, isoform CRA b                                                       | Shpk         | -0.253739088 |
| D4A914     | 5'-3' exoribonuclease 2                                                                       | Xrn2         | -0.253739088 |
| Q4KLI7     | Splicing factor 3a, subunit 3                                                                 | Sf3a3        | -0.253739088 |
| A0A0G2K8S6 | Glucosidase 1                                                                                 | LOC103692171 | -0.253739088 |
| Q9WUF4     | Vesicle-associated membrane protein 8                                                         | Vamp8        | -0.253739088 |
| F1LN59     | Eukaryotic translation initiation factor 4, gamma 2                                           | Eif4g2       | -0.263739088 |
| Q32PZ3     | Protein unc-45 homolog A                                                                      | Unc45a       | -0.263739088 |
| G3V928     | LDL receptor-related protein 1                                                                | Lrp1         | -0.263739088 |
| Q66H98     | Serum deprivation-response protein                                                            | Sdpr         | -0.263739088 |
| P97538     | Ras-related protein M-Ras                                                                     | Mras         | -0.263739088 |
| P20611     | Lysosomal acid phosphatase                                                                    | Acp2         | -0.273739088 |
| F7F350     | Synapse associated protein 1, isoform CRA a                                                   | Syap1        | -0.273739088 |
| G3V7B3     | Chloride channel protein                                                                      | Clcnkb       | -0.273739088 |
| B2RYI2     | Signal recognition particle subunit SRP68                                                     | Srp68        | -0.273739088 |
| F1M3W5     | Dmx-like 2                                                                                    | Dmxl2        | -0.273739088 |

|            |                                                                           |           |              |
|------------|---------------------------------------------------------------------------|-----------|--------------|
| D3ZK45     | Uncharacterized protein                                                   | Epb4115   | -0.283739088 |
| Q5BK74     | Transcription elongation factor A (SII), 3                                | Tcea3     | -0.283739088 |
| Q9JLA3     | UDP-glucose:glycoprotein glucosyltransferase 1                            | Uggt1     | -0.293739088 |
| D3ZMY7     | 5'-nucleotidase, cytosolic II                                             | Nt5c2     | -0.293739088 |
| A0A0G2K5K7 | Inositol polyphosphate-5-phosphatase K                                    | Inpp5k    | -0.293739088 |
| O54715     | V-type proton ATPase subunit S1                                           | Atp6ap1   | -0.293739088 |
| P62870     | Elongin-B                                                                 | Elob      | -0.293739088 |
| A0A0G2K695 | Myoferlin                                                                 | Myof      | -0.303739088 |
| D3ZCD4     | Phosphatidylinositol transfer protein beta isoform                        | Pitpnb    | -0.303739088 |
| D3ZM09     | Seryl-tRNA synthetase 2 (Predicted)                                       | Sars2     | -0.303739088 |
| Q9R066     | Coxsackievirus and adenovirus receptor homolog                            | Cxadr     | -0.323739088 |
| O35567     | Bifunctional purine biosynthesis protein PURH                             | Atic      | -0.323739088 |
| D4A031     | DEAD (Asp-Glu-Ala-Asp) box polypeptide 42 (Predicted)                     | Ddx42     | -0.323739088 |
| Q64240     | Protein AMBP                                                              | Ambp      | -0.323739088 |
| B1WB55     | DnaJ (Hsp40) homolog, subfamily C, member 11                              | Dnajc11   | -0.333739088 |
| P19234     | NADH dehydrogenase [ubiquinone] flavoprotein 2, mitochondrial             | Ndufv2    | -0.333739088 |
| D4A4H5     | Stromal cell derived factor 2 (Predicted), isoform CRA_b                  | Sdf2      | -0.343739088 |
| Q68FV6     | Glycosylated lysosomal membrane protein                                   | Glmp      | -0.343739088 |
| A0A0G2JZG7 | Serine--tRNA ligase, cytoplasmic                                          | Sars      | -0.363739088 |
| D3ZGE6     | Cortactin, isoform CRA_c                                                  | Cttn      | -0.373739088 |
| Q498T4     | 39S ribosomal protein L2, mitochondrial                                   | Mrpl2     | -0.383739088 |
| P36506     | Dual specificity mitogen-activated protein kinase kinase 2                | Map2k2    | -0.393739088 |
| P20037     | Rano class II histocompatibility antigen, B alpha chain                   | RT1-Ba    | -0.403739088 |
| Q6IMX3     | Acetyl-Coenzyme A dehydrogenase, short chain, isoform CRA_a               | Acads     | -0.423739088 |
| D3ZE63     | Uncharacterized protein                                                   | LOC679748 | -0.423739088 |
| P25236     | Selenoprotein P                                                           | Selenop   | -0.513739088 |
| A0A0G2K394 | Low molecular weight phosphotyrosine protein phosphatase                  | Acp1      | -0.583739088 |
| D4A0Y4     | Oxidoreductase NAD-binding domain containing 1 (Predicted), isoform CRA_b | Oxnad1    | -0.683739088 |
| P59382     | Peroxisomal membrane protein 4                                            | Pxmp4     | -0.693739088 |
| Q5BK66     | HSPB1-associated protein 1                                                | Hspbap1   | -0.723739088 |
| D3ZVK7     | Histone H2A                                                               | Hist1h2ak | -0.743739088 |

**Table S2.** Differentially expressed renal proteins in response to cyclosporine treatment. Proteins that demonstrated a significant ( $p < 0.05$ ) deviation from background expression levels, when comparing samples from cyclosporine-treated animals compared to controls are depicted in the table. For each differentially regulated protein the Uniprot accession #, description, official Gene Symbol and the log<sub>2</sub> transformed expression ratio (Cyclosporine:Control) is given.

| Accession # | Protein Description                                                         | Gene Symbol  | Cyclosporine:Control (Log <sub>2</sub> ) |
|-------------|-----------------------------------------------------------------------------|--------------|------------------------------------------|
| F1M8E9      | Lysozyme f2                                                                 | Lyz2         | 1.09600388                               |
| P08424      | Renin                                                                       | Ren1         | 0.94600388                               |
| Q6AYR1      | RCG52996, isoform CRA a                                                     | Tfg          | 0.76600388                               |
| P06302      | Prothymosin alpha                                                           | Ptma         | 0.76600388                               |
| P08934      | Kininogen-1                                                                 | Kng1         | 0.74600388                               |
| D4A3X0      | Uncharacterized protein                                                     | Cep192       | 0.66600388                               |
| A0A0G2K1G0  | BCL2-associated transcription factor 1                                      | Bclaf1       | 0.60600388                               |
| G3V6Y9      | Peptidyl-prolyl cis-trans isomerase G                                       | Ppig         | 0.56600388                               |
| P20760      | Ig gamma-2A chain C region                                                  | Igg-2a       | 0.55600388                               |
| Q6MGB4      | H2-K region expressed gene 4, rat orthologue                                | Slc39a7      | 0.54600388                               |
| M0R7Y9      | Uncharacterized protein                                                     | M0R7Y9       | 0.54600388                               |
| P04550      | Parathymosin                                                                | Ptms         | 0.53600388                               |
| A0A0G2JWK7  | Transgelin                                                                  | Tagln        | 0.52600388                               |
| G3V8R0      | Similar to sid2057p                                                         | RGD1311703   | 0.52600388                               |
| A0A0G2K6H6  | Sodium-dependent phosphate transport protein 1                              | Slc17a1      | 0.52600388                               |
| Q4KLJ0      | High mobility group nucleosomal binding domain 2                            | LOC100360316 | 0.51600388                               |
| D4ACN6      | Collagen type IV alpha 3-binding protein                                    | Col4a3bp     | 0.51600388                               |
| P20411      | High affinity immunoglobulin epsilon receptor subunit gamma                 | Fcer1g       | 0.50600388                               |
| P24268      | Cathepsin D                                                                 | Ctsd         | 0.49600388                               |
| G3V8L1      | PYD and CARD domain containing                                              | Pycard       | 0.49600388                               |
| Q91V33      | KH domain-containing, RNA-binding, signal transduction-associated protein 1 | Khdrbs1      | 0.48600388                               |
| P47875      | Cysteine and glycine-rich protein 1                                         | Csrp1        | 0.48600388                               |
| D3ZBN0      | Histone H1.5                                                                | Hist1h1b     | 0.45600388                               |
| F1M1W1      | Acyl-CoA synthetase medium-chain family member 1                            | Acsml        | 0.45600388                               |
| Q9Z2Y0      | Glycine N-acyltransferase-like protein Keg1                                 | Keg1         | 0.44600388                               |
| Q499V1      | Uridine phosphorylase                                                       | Upp1         | 0.42600388                               |
| F1M446      | Uncharacterized protein                                                     | RGD1306148   | 0.42600388                               |
| A0A0G2K2M9  | Serine/arginine repetitive matrix 2                                         | Srrm2        | 0.41600388                               |
| D4A8Z3      | Ferric-chelate reductase 1                                                  | Frrs1        | 0.41600388                               |
| Q6AYI2      | Kelch domain-containing protein 3                                           | Klhdc3       | 0.41600388                               |
| Q6IN37      | GM2 ganglioside activator                                                   | Gm2a         | 0.41600388                               |

|            |                                                                                               |              |             |
|------------|-----------------------------------------------------------------------------------------------|--------------|-------------|
| A0A0G2K014 | Lymphocyte cytosolic protein 1                                                                | Lcp1         | 0.39600388  |
| Q07782     | Solute carrier family 13 member 1                                                             | Slc13a1      | 0.39600388  |
| A0A0G2JSZ5 | Protein disulfide-isomerase A6                                                                | Pdia6        | 0.38600388  |
| G3V6P6     | RNA binding motif protein 3, isoform CRA a                                                    | Rbm3         | 0.38600388  |
| F1M853     | Ribosome-binding protein 1                                                                    | Rrbp1        | 0.38600388  |
| P05964     | Protein S100-A6                                                                               | S100a6       | 0.37600388  |
| Q9QX67     | Death-associated protein 1                                                                    | Dap          | 0.37600388  |
| A0A0G2K654 | Histone cluster 1 H1 family member c                                                          | Hist1h1c     | 0.36600388  |
| P07150     | Annexin A1                                                                                    | Anxa1        | 0.36600388  |
| A0A0G2JSQ3 | Solute carrier family 22 (Organic anion transporter), member 8, isoform CRA a                 | Slc22a8      | 0.36600388  |
| P14668     | Annexin A5                                                                                    | Anxa5        | 0.35600388  |
| Q8K585     | High mobility group protein HMG-I/HMG-Y                                                       | Hmga1        | 0.35600388  |
| F1LPS3     | Nucleolar and coiled-body phosphoprotein 1                                                    | Nolc1        | 0.35600388  |
| D4A6D9     | HCLS1-binding protein 3                                                                       | Hs1bp3       | 0.35600388  |
| F1MAC0     | Interferon gamma-inducible protein 47                                                         | Ifi47        | 0.35600388  |
| F1LMW7     | Myristoylated alanine-rich C-kinase substrate                                                 | Marcks       | 0.35600388  |
| Q9WVJ6     | Tissue-type transglutaminase                                                                  | Tgm2         | 0.34600388  |
| Q5HZY0     | UBX domain-containing protein 4                                                               | Ubxn4        | 0.33600388  |
| P02770     | Serum albumin                                                                                 | Alb          | 0.33600388  |
| D4AEG7     | TBC1 domain family, member 13                                                                 | Tbc1d13      | 0.33600388  |
| Q6P762     | Alpha-mannosidase                                                                             | Man2b1       | 0.33600388  |
| Q63042     | FAD-linked sulfhydryl oxidase ALR                                                             | Gfer         | 0.33600388  |
| O54772     | SWI/SNF-related matrix-associated actin-dependent regulator of chromatin subfamily D member 2 | Smardc2      | 0.33600388  |
| P07872     | Peroxisomal acyl-coenzyme A oxidase 1                                                         | Acox1        | 0.32600388  |
| Q5PQK2     | Fused in sarcoma RNA-binding protein                                                          | Fus          | 0.32600388  |
| Q07936     | Annexin A2                                                                                    | Anxa2        | 0.31600388  |
| A0A096MKG5 | NAD kinase 2, mitochondrial                                                                   | Nadk2        | 0.31600388  |
| A0A0G2JW12 | Complement component 4A (Rodgers blood group)                                                 | C4a          | 0.30600388  |
| D4A7U1     | Zyxin                                                                                         | Zyx          | 0.30600388  |
| A0A0G2K9B1 | Serine protease inhibitor                                                                     | LOC299282    | 0.30600388  |
| F1LR87     | Beta-hexosaminidase                                                                           | Hexb         | 0.30600388  |
| F7FJQ3     | NPC intracellular cholesterol transporter 2                                                   | Npc2         | 0.30600388  |
| Q63797     | Proteasome activator complex subunit 1                                                        | Psme1        | 0.29600388  |
| D4A779     | Pleckstrin homology-like domain, family B, member 2                                           | Phldb2       | 0.29600388  |
| G3V8X5     | Solute carrier family 5 member 10                                                             | Slc5a10      | -0.29399612 |
| P80432     | Cytochrome c oxidase subunit 7C, mitochondrial                                                | Cox7c        | -0.29399612 |
| D3ZE15     | NADH dehydrogenase [ubiquinone] 1 alpha subcomplex subunit 13-like                            | LOC100911483 | -0.29399612 |
| P03889     | NADH-ubiquinone oxidoreductase chain 1                                                        | Mtnd1        | -0.30399612 |
| Q5U2X8     | Acyl-CoA thioesterase 9                                                                       | Acot9        | -0.30399612 |
| G3V7I0     | Peroxiredoxin 3                                                                               | Prdx3        | -0.30399612 |
| Q9WUF4     | Vesicle-associated membrane protein 8                                                         | Vamp8        | -0.30399612 |

|            |                                                                           |            |             |
|------------|---------------------------------------------------------------------------|------------|-------------|
| P62870     | Elongin-B                                                                 | Elob       | -0.30399612 |
| P46844     | Biliverdin reductase A                                                    | Blvra      | -0.31399612 |
| Q9JJI3     | Alpha-2u globulin                                                         | LOC259244  | -0.31399612 |
| P07379     | Phosphoenolpyruvate carboxykinase, cytosolic [GTP]                        | Pck1       | -0.31399612 |
| P23764     | Glutathione peroxidase 3                                                  | Gpx3       | -0.31399612 |
| A0A0G2JVE6 | Alanyl (Membrane) aminopeptidase                                          | Anpep      | -0.32399612 |
| A0A096MJW3 | Uncharacterized protein (Fragment)                                        | A0A096MJW3 | -0.32399612 |
| D3ZTX4     | Uncharacterized protein                                                   | Mgam       | -0.32399612 |
| M0RAK3     | Solute carrier family 12 member 9                                         | Slc12a9    | -0.32399612 |
| A2VD16     | Aldo-keto reductase family 1, member C12-like 1                           | Akr1c12l1  | -0.33399612 |
| P04903     | Glutathione S-transferase alpha-2                                         | Gsta2      | -0.34399612 |
| D3ZVK7     | Histone H2A                                                               | Hist1h2ak  | -0.34399612 |
| D3ZD09     | Cytochrome c oxidase subunit                                              | Cox6b1     | -0.35399612 |
| P80431     | Cytochrome c oxidase subunit 7B, mitochondrial                            | Cox7b      | -0.35399612 |
| Q68FV6     | Glycosylated lysosomal membrane protein                                   | Glmp       | -0.35399612 |
| D4A0Y4     | Oxidoreductase NAD-binding domain containing 1 (Predicted), isoform CRA b | Oxnad1     | -0.35399612 |
| P19234     | NADH dehydrogenase [ubiquinone] flavoprotein 2, mitochondrial             | Ndufv2     | -0.36399612 |
| D3ZDM4     | Similar to KIAA1919 protein                                               | RGD1310495 | -0.37399612 |
| P26453     | Basigin                                                                   | Bsg        | -0.37399612 |
| Q64319     | Neutral and basic amino acid transport protein rBAT                       | Slc3a1     | -0.39399612 |
| P51907     | Excitatory amino acid transporter 3                                       | Slc1a1     | -0.39399612 |
| A0A0G2KA82 | Synaptophysin-like 1                                                      | Sypl1      | -0.39399612 |
| B0BNI6     | Similar to solute carrier family 25, member 35, isoform CRA a             | Slc25a35   | -0.39399612 |
| Q5RKI7     | Solute carrier family 7 member 13                                         | Slc7a13    | -0.40399612 |
| Q64611     | Cysteine sulfinic acid decarboxylase                                      | Csad       | -0.40399612 |
| D3ZPY8     | Aldo-keto reductase family 1, member C13                                  | Akr1c13    | -0.42399612 |
| P15684     | Aminopeptidase N                                                          | Anpep      | -0.42399612 |
| F1LPQ6     | Uncharacterized protein                                                   | Ighm       | -0.44399612 |
| D3ZE63     | Uncharacterized protein                                                   | LOC679748  | -0.46399612 |
| P59382     | Peroxisomal membrane protein 4                                            | Pxmp4      | -0.46399612 |
| Q03336     | Regucalcin                                                                | Rgn        | -0.47399612 |
| M0R4N4     | Dehydrogenase/reductase (SDR family) member 7-like 1                      | Dhrs7l1    | -0.48399612 |
| P20816     | Cytochrome P450 4A2                                                       | Cyp4a2     | -0.49399612 |
| Q01728     | Sodium/calcium exchanger 1                                                | Slc8a1     | -0.52399612 |
| Q5BKC6     | HSPB1-associated protein 1                                                | Hspbap1    | -0.56399612 |
| Q01984     | Histamine N-methyltransferase                                             | Hnmt       | -0.58399612 |
| P07171     | Calbindin                                                                 | Calb1      | -0.67399612 |
| Q6AYQ9     | Peptidyl-prolyl cis-trans isomerase                                       | Ppic       | -0.72399612 |
| P46720     | Solute carrier organic anion transporter family member 1A1                | Slco1a1    | -0.76399612 |
| A0A0G2JSH2 | 3-hydroxybutyrate dehydrogenase, type 1, isoform                          | Bdh1       | -0.77399612 |

|        |                       |     |             |
|--------|-----------------------|-----|-------------|
|        | CRA_a                 |     |             |
| P02761 | Major urinary protein | Mup | -1.08399612 |



**Table S3.** Venn diagram analysis of differentially expressed renal proteins in response to either dehydration or cyclosporine treatment. For each significantly-regulated protein the respective log<sub>2</sub> transform of the expression change (positive for upregulation versus control rats, negative for downregulation versus control rats) and the official Gene Symbol are given.

| Gene Symbol  | Dehydration:Control | Cyclosporine:Control |
|--------------|---------------------|----------------------|
| Igg-2a       | 0.536260912         | 0.55600388           |
| Alb          | 0.316260912         | 0.33600388           |
| Anxa5        | 0.266260912         | 0.35600388           |
| Kng1         | 0.236260912         | 0.74600388           |
| C4a          | 0.236260912         | 0.30600388           |
| S100a6       | 0.216260912         | 0.37600388           |
| Hist1h1c     | 0.216260912         | 0.36600388           |
|              |                     |                      |
| Mup          | -0.233739088        | -1.08399612          |
| Vamp8        | -0.253739088        | -0.30399612          |
| Elob         | -0.293739088        | -0.30399612          |
| Ndufv2       | -0.333739088        | -0.36399612          |
| Glmp         | -0.343739088        | -0.35399612          |
| LOC679748    | -0.423739088        | -0.46399612          |
| Oxnad1       | -0.683739088        | -0.35399612          |
| Pxmp4        | -0.693739088        | -0.46399612          |
| Hspbap1      | -0.723739088        | -0.56399612          |
| Hist1h2ak    | -0.743739088        | -0.34399612          |
|              |                     |                      |
| Rgn          | 0.286260912         | -0.47399612          |
| Akr1c13      | 0.256260912         | -0.42399612          |
| Ighm         | 0.236260912         | -0.44399612          |
| Hnmt         | 0.226260912         | -0.58399612          |
| Klhdc3       | -0.223739088        | 0.41600388           |
| Gm2a         | -0.253739088        | 0.41600388           |
| Smarcd2      | -0.253739088        | 0.33600388           |
|              |                     |                      |
| LOC103694855 | 0.696260912         |                      |
| RGD1562402   | 0.626260912         |                      |
| Hba-a2       | 0.446260912         |                      |
| Hbb          | 0.446260912         |                      |
| Hbb2         | 0.436260912         |                      |
| A1i3         | 0.326260912         |                      |
| Scin         | 0.306260912         |                      |
| Hibch        | 0.306260912         |                      |
| Rwdd2b       | 0.306260912         |                      |
| Dut          | 0.306260912         |                      |
| A1m          | 0.296260912         |                      |
| Ca1          | 0.296260912         |                      |
| Klc2         | 0.286260912         |                      |

|              |              |  |
|--------------|--------------|--|
| Mrps30       | 0.266260912  |  |
| Atp1a2       | 0.266260912  |  |
| Slc4a1       | 0.266260912  |  |
| Cryab        | 0.266260912  |  |
| Ddrgk1       | 0.256260912  |  |
| Myo1e        | 0.236260912  |  |
| Podxl        | 0.236260912  |  |
| Atp5j2       | 0.236260912  |  |
| Rbm15        | 0.226260912  |  |
| Gmps         | 0.226260912  |  |
| Crp          | 0.226260912  |  |
| Me1          | 0.226260912  |  |
| Slc6a6       | 0.216260912  |  |
|              |              |  |
| Cst3         | -0.213739088 |  |
| Zbed5        | -0.213739088 |  |
| Itpr3        | -0.213739088 |  |
| Mtco1        | -0.213739088 |  |
| Tmem43       | -0.213739088 |  |
| F1LTJ5       | -0.223739088 |  |
| Ecsit        | -0.223739088 |  |
| Ppp5c        | -0.223739088 |  |
| Sbf1         | -0.233739088 |  |
| Hnrnp11      | -0.233739088 |  |
| Trip4        | -0.233739088 |  |
| Atpif1       | -0.233739088 |  |
| Vps18        | -0.233739088 |  |
| Acy3         | -0.233739088 |  |
| LOC100910056 | -0.243739088 |  |
| Snx18        | -0.243739088 |  |
| Rpl27a       | -0.243739088 |  |
| Spr          | -0.243739088 |  |
| Nub1         | -0.253739088 |  |
| Bpnt1        | -0.253739088 |  |
| Cd34         | -0.253739088 |  |
| Shpk         | -0.253739088 |  |
| Xrn2         | -0.253739088 |  |
| Sf3a3        | -0.253739088 |  |
| LOC103692171 | -0.253739088 |  |
| Eif4g2       | -0.263739088 |  |
| Unc45a       | -0.263739088 |  |
| Lrp1         | -0.263739088 |  |
| Sdpr         | -0.263739088 |  |
| Mras         | -0.263739088 |  |
| Acp2         | -0.273739088 |  |

|              |              |            |
|--------------|--------------|------------|
| Syap1        | -0.273739088 |            |
| Clcnkb       | -0.273739088 |            |
| Srp68        | -0.273739088 |            |
| Dmxl2        | -0.273739088 |            |
| Epb4115      | -0.283739088 |            |
| Tcea3        | -0.283739088 |            |
| Uggt1        | -0.293739088 |            |
| Nt5c2        | -0.293739088 |            |
| Inpp5k       | -0.293739088 |            |
| Atp6ap1      | -0.293739088 |            |
| Myof         | -0.303739088 |            |
| Pitpnb       | -0.303739088 |            |
| Sars2        | -0.303739088 |            |
| Cxadr        | -0.323739088 |            |
| Atic         | -0.323739088 |            |
| Ddx42        | -0.323739088 |            |
| Ambp         | -0.323739088 |            |
| Dnajc11      | -0.333739088 |            |
| Sdf2         | -0.343739088 |            |
| Sars         | -0.363739088 |            |
| Ctnn         | -0.373739088 |            |
| Mrpl2        | -0.383739088 |            |
| Map2k2       | -0.393739088 |            |
| RT1-Ba       | -0.403739088 |            |
| Acads        | -0.423739088 |            |
| Selenop      | -0.513739088 |            |
| Acpl         | -0.583739088 |            |
|              |              |            |
| Lyz2         |              | 1.09600388 |
| Ren1         |              | 0.94600388 |
| Tfg          |              | 0.76600388 |
| Ptma         |              | 0.76600388 |
| Cep192       |              | 0.66600388 |
| Bclaf1       |              | 0.60600388 |
| Ppig         |              | 0.56600388 |
| Slc39a7      |              | 0.54600388 |
| MOR7Y9       |              | 0.54600388 |
| Ptms         |              | 0.53600388 |
| Tagln        |              | 0.52600388 |
| RGD1311703   |              | 0.52600388 |
| Slc17a1      |              | 0.52600388 |
| LOC100360316 |              | 0.51600388 |
| Col4a3bp     |              | 0.51600388 |
| Fcer1g       |              | 0.50600388 |
| Ctsd         |              | 0.49600388 |

|              |  |             |
|--------------|--|-------------|
| Pycard       |  | 0.49600388  |
| Khdrbs1      |  | 0.48600388  |
| Csrp1        |  | 0.48600388  |
| Hist1h1b     |  | 0.45600388  |
| Acsml        |  | 0.45600388  |
| Kegl         |  | 0.44600388  |
| Upp1         |  | 0.42600388  |
| RGD1306148   |  | 0.42600388  |
| Srrm2        |  | 0.41600388  |
| Frrs1        |  | 0.41600388  |
| Lcp1         |  | 0.39600388  |
| Slc13a1      |  | 0.39600388  |
| Pdia6        |  | 0.38600388  |
| Rbm3         |  | 0.38600388  |
| Rrbp1        |  | 0.38600388  |
| Dap          |  | 0.37600388  |
| Anxa1        |  | 0.36600388  |
| Slc22a8      |  | 0.36600388  |
| Hmga1        |  | 0.35600388  |
| Nolc1        |  | 0.35600388  |
| Hs1bp3       |  | 0.35600388  |
| Ifi47        |  | 0.35600388  |
| Marcks       |  | 0.35600388  |
| Tgm2         |  | 0.34600388  |
| Ubxn4        |  | 0.33600388  |
| Tbc1d13      |  | 0.33600388  |
| Man2b1       |  | 0.33600388  |
| Gfer         |  | 0.33600388  |
| Acox1        |  | 0.32600388  |
| Fus          |  | 0.32600388  |
| Anxa2        |  | 0.31600388  |
| Nadk2        |  | 0.31600388  |
| Zyx          |  | 0.30600388  |
| LOC299282    |  | 0.30600388  |
| Hexb         |  | 0.30600388  |
| Npc2         |  | 0.30600388  |
| Psmc1        |  | 0.29600388  |
| Phldb2       |  | 0.29600388  |
|              |  |             |
| Slc5a10      |  | -0.29399612 |
| Cox7c        |  | -0.29399612 |
| LOC100911483 |  | -0.29399612 |
| Mtnd1        |  | -0.30399612 |
| Acot9        |  | -0.30399612 |
| Prdx3        |  | -0.30399612 |

|            |  |             |
|------------|--|-------------|
| Blvra      |  | -0.31399612 |
| LOC259244  |  | -0.31399612 |
| Pck1       |  | -0.31399612 |
| Gpx3       |  | -0.31399612 |
| Anpep      |  | -0.32399612 |
| A0A096MJW3 |  | -0.32399612 |
| Mgam       |  | -0.32399612 |
| Slc12a9    |  | -0.32399612 |
| Akr1c1211  |  | -0.33399612 |
| Gsta2      |  | -0.34399612 |
| Cox6b1     |  | -0.35399612 |
| Cox7b      |  | -0.35399612 |
| RGD1310495 |  | -0.37399612 |
| Bsg        |  | -0.37399612 |
| Slc3a1     |  | -0.39399612 |
| Slc1a1     |  | -0.39399612 |
| Syp11      |  | -0.39399612 |
| Slc25a35   |  | -0.39399612 |
| Slc7a13    |  | -0.40399612 |
| Csad       |  | -0.40399612 |
| Dhrs711    |  | -0.48399612 |
| Cyp4a2     |  | -0.49399612 |
| Slc8a1     |  | -0.52399612 |
| Calb1      |  | -0.67399612 |
| Ppic       |  | -0.72399612 |
| Slco1a1    |  | -0.76399612 |
| Bdh1       |  | -0.77399612 |

**Table S4.** Gene Ontology-based interpretation of dehydration-induced proteomic perturbations. Gene Ontology terms that demonstrated a significant ( $p < 0.05$ ) enrichment using data from dehydrated animals compared to controls are indicated. For each differentially regulated Gene Ontology (GO) term the process name, GO term ID, enrichment p value (P-value) as well as the proteins from the input data set that populate the specific GO term are represented.

| GO Biological Process Term                               | GO term ID | P-value     | Proteins                           |
|----------------------------------------------------------|------------|-------------|------------------------------------|
| organic anion transport                                  | GO:0015711 | 6.01E-05    | SLC6A6;CA1;PITPNB;ALB;HBB;SLC4A1   |
| purine ribonucleoside monophosphate metabolic process    | GO:0009167 | 6.33E-05    | ATIC;GMPS;ATP1A2;NT5C2             |
| endocytosis                                              | GO:0006897 | 5.79E-04    | MYO1E;SNX18;AMBP;CTTN;LRP1;ALB;HBB |
| pteridine-containing compound biosynthetic process       | GO:0042559 | 5.96E-04    | SPR;ATPIF1                         |
| glomerular visceral epithelial cell development          | GO:0072015 | 7.92E-04    | MYO1E;PODXL                        |
| glomerular epithelial cell development                   | GO:0072310 | 7.92E-04    | MYO1E;PODXL                        |
| glomerular filtration                                    | GO:0003094 | 0.001263836 | MYO1E;CD34                         |
| regulated exocytosis                                     | GO:0045055 | 0.001292202 | SCIN;SELENOP;ALB;ANXA5;KNG1        |
| purine ribonucleoside monophosphate biosynthetic process | GO:0009168 | 0.001308246 | ATIC;GMPS;ATP5J2                   |
| bicarbonate transport                                    | GO:0015701 | 0.001508262 | CA1;HBB;SLC4A1                     |
| renal filtration                                         | GO:0097205 | 0.00153925  | MYO1E;CD34                         |
| purine nucleoside monophosphate biosynthetic process     | GO:0009127 | 0.001840599 | ATIC;GMPS                          |
| positive regulation of transport                         | GO:0051050 | 0.001842571 | SCIN;LRP1;INPP5K                   |
| negative regulation of hemostasis                        | GO:1900047 | 0.0021676   | CD34;KNG1                          |
| glomerular visceral epithelial cell differentiation      | GO:0072112 | 0.0021676   | MYO1E;PODXL                        |
| ER-associated misfolded protein catabolic process        | GO:0071712 | 0.0021676   | SDF2;UGGT1                         |
| ribonucleoside monophosphate biosynthetic process        | GO:0009156 | 0.002519972 | ATIC;GMPS                          |
| regulation of extracellular matrix disassembly           | GO:0010715 | 0.002519972 | CST3;LRP1                          |
| negative regulation of coagulation                       | GO:0050819 | 0.002897438 | CD34;KNG1                          |
| receptor-mediated endocytosis                            | GO:0006898 | 0.003633962 | AMBP;CTTN;LRP1;ALB;HBB             |
| NADP metabolic process                                   | GO:0006739 | 0.004652742 | SHPK;ME1                           |
| negative regulation of calcium ion transport             | GO:0051926 | 0.004652742 | INPP5K;ATP1A2                      |
| platelet degranulation                                   | GO:0002576 | 0.00472532  | SELENOP;ALB;ANXA5;KNG1             |
| vesicle organization                                     | GO:0016050 | 0.00513798  | VAMP8;VPS18;SNX18;CD34             |
| cellular response to misfolded protein                   | GO:0071218 | 0.005673876 | SDF2;UGGT1                         |

|                                                                                   |                |                 |                             |
|-----------------------------------------------------------------------------------|----------------|-----------------|-----------------------------|
| purine ribonucleotide metabolic process                                           | GO:0009<br>150 | 0.005709<br>297 | ATP1A2;BPNT1;NT5C2          |
| regulation of cardiac conduction                                                  | GO:1903<br>779 | 0.005949<br>632 | CXADR;ITPR3;ATP1A2          |
| positive regulation of proteolysis involved in cellular protein catabolic process | GO:1903<br>052 | 0.006219<br>384 | DDRGK1;ATPIF1               |
| cellular response to epidermal growth factor stimulus                             | GO:0071<br>364 | 0.008628<br>278 | SYAP1;INPP5K                |
| negative regulation of wound healing                                              | GO:0061<br>045 | 0.008628<br>278 | CD34;KNG1                   |
| misfolded or incompletely synthesized protein catabolic process                   | GO:0006<br>515 | 0.008628<br>278 | SDF2;UGGT1                  |
| hydrogen ion transmembrane transport                                              | GO:1902<br>600 | 0.010666<br>021 | ATP6AP1;ATP5J2              |
| coenzyme biosynthetic process                                                     | GO:0009<br>108 | 0.011387<br>949 | SPR;ATPIF1                  |
| regulation of blood coagulation                                                   | GO:0030<br>193 | 0.012130<br>806 | CD34;KNG1                   |
| proton transport                                                                  | GO:0015<br>992 | 0.012894<br>35  | ATP6AP1;ATP5J2              |
| post-translational protein modification                                           | GO:0043<br>687 | 0.013123<br>909 | CST3;C4A;NUB1;ALB;ELOB;KNG1 |
| regulation of nitric oxide biosynthetic process                                   | GO:0045<br>428 | 0.013678<br>342 | HBB;CD34                    |
| regulation of cell death                                                          | GO:0010<br>941 | 0.015644<br>367 | LRP1;HBB;CRYAB              |
| positive regulation of RNA metabolic process                                      | GO:0051<br>254 | 0.016150<br>616 | MAP2K2;HNRNPLL              |
| negative regulation of blood coagulation                                          | GO:0030<br>195 | 0.017014<br>025 | CD34;KNG1                   |
| negative regulation of transport                                                  | GO:0051<br>051 | 0.020658<br>095 | INPP5K;CRYAB                |
| regulation of ATPase activity                                                     | GO:0043<br>462 | 0.020658<br>095 | ATPIF1;RGN                  |
| tRNA aminoacylation                                                               | GO:0043<br>039 | 0.020658<br>095 | SARS2;SARS                  |
| negative regulation of proteolysis                                                | GO:0045<br>861 | 0.021615<br>589 | CST3;KNG1                   |
| cellular response to insulin stimulus                                             | GO:0032<br>869 | 0.022300<br>631 | ATP6AP1;SYAP1;INPP5K        |
| positive regulation of multicellular organismal process                           | GO:0051<br>240 | 0.024379<br>176 | VAMP8;LRP1;INPP5K;CD34      |
| carboxylic acid biosynthetic process                                              | GO:0046<br>394 | 0.024596<br>058 | ATPIF1;RGN                  |
| tRNA aminoacylation for protein translation                                       | GO:0006<br>418 | 0.026670<br>848 | SARS2;SARS                  |
| protein heterooligomerization                                                     | GO:0051<br>291 | 0.029910<br>477 | HBB;ITPR3                   |
| dephosphorylation                                                                 | GO:0016<br>311 | 0.030274<br>762 | PPP5C;INPP5K;SBF1           |
| negative regulation of macromolecule metabolic process                            | GO:0010<br>605 | 0.030274<br>762 | MAP2K2;DDRGK1;CD34          |
| protein oligomerization                                                           | GO:0051<br>259 | 0.030580<br>844 | ATPIF1;HBB;ITPR3;CRYAB      |
| fatty acid oxidation                                                              | GO:0019<br>395 | 0.031023<br>499 | ACADS;HIBCH                 |
| fatty acid beta-oxidation                                                         | GO:0006<br>635 | 0.031023<br>499 | ACADS;HIBCH                 |

|                                                      |                |                 |                               |
|------------------------------------------------------|----------------|-----------------|-------------------------------|
| positive regulation of actin filament polymerization | GO:0030<br>838 | 0.032152<br>748 | SCIN;CTTN                     |
| cytoplasmic translation                              | GO:0002<br>181 | 0.035635<br>833 | MRPL2;RPL27A                  |
| translation                                          | GO:0006<br>412 | 0.037635<br>005 | MRPL2;SARS2;RPL27A;SARS       |
| negative regulation of cellular catabolic process    | GO:0031<br>330 | 0.038035<br>332 | CST3;EIF4G2                   |
| ATP metabolic process                                | GO:0046<br>034 | 0.038035<br>332 | ATP1A2;ATP5J2                 |
| positive regulation of cell death                    | GO:0010<br>942 | 0.039257<br>722 | LRP1;HBB                      |
| positive regulation of protein binding               | GO:0032<br>092 | 0.043013<br>126 | LRP1;SYAP1                    |
| actin cytoskeleton reorganization                    | GO:0031<br>532 | 0.044293<br>703 | CXADR;CTTN                    |
| negative regulation of peptidase activity            | GO:0010<br>466 | 0.045588<br>353 | CST3;KNG1                     |
| regulation of proteolysis                            | GO:0030<br>162 | 0.046896<br>89  | CST3;KNG1                     |
| cellular protein metabolic process                   | GO:0044<br>267 | 0.047789<br>743 | CST3;C4A;RPL27A;ALB;SARS;KNG1 |
| NADH dehydrogenase complex assembly                  | GO:0010<br>257 | 0.048219<br>13  | ECSIT;NDUFV2                  |
| mitochondrial respiratory chain complex I biogenesis | GO:0097<br>031 | 0.048219<br>13  | ECSIT;NDUFV2                  |
| mitochondrial respiratory chain complex I assembly   | GO:0032<br>981 | 0.048219<br>13  | ECSIT;NDUFV2                  |
| cellular macromolecule biosynthetic process          | GO:0034<br>645 | 0.049360<br>676 | PPP5C;DUT;RPL27A;SARS;EIF4G2  |
| negative regulation of cell adhesion                 | GO:0007<br>162 | 0.049554<br>889 | PODXL;KNG1                    |
| fatty acid catabolic process                         | GO:0009<br>062 | 0.049554<br>889 | ACADS;HIBCH                   |



**Table S5.** Gene Ontology-based interpretation of cyclosporine-induced proteomic perturbations. Gene Ontology terms that demonstrated a significant ( $p < 0.05$ ) enrichment using data from cyclosporine-treated animals compared to controls are indicated. For each differentially regulated Gene Ontology (GO) term the process name, GO term ID, enrichment p value (P-value) as well as the proteins from the input data set that populate the specific GO term are represented.

| GO Biological Process Term                               | GO term ID | P-value     | Proteins                                                        |
|----------------------------------------------------------|------------|-------------|-----------------------------------------------------------------|
| neutrophil degranulation                                 | GO:0043312 | 8.05E-05    | PYCARD;VAMP8;MGAM;FCER1G;GM2A;ANXA2;NPC2;ANPEP;HEXB;MAN2B1;CTSD |
| neutrophil activation involved in immune response        | GO:0002283 | 8.66E-05    | PYCARD;VAMP8;MGAM;FCER1G;GM2A;ANXA2;NPC2;ANPEP;HEXB;MAN2B1;CTSD |
| neutrophil mediated immunity                             | GO:0002446 | 9.32E-05    | PYCARD;VAMP8;MGAM;FCER1G;GM2A;ANXA2;NPC2;ANPEP;HEXB;MAN2B1;CTSD |
| mitochondrial electron transport, cytochrome c to oxygen | GO:0006123 | 2.11E-04    | COX7B;COX7C;COX6B1                                              |
| sodium ion transport                                     | GO:0006814 | 3.35E-04    | SLC13A1;SLC5A10;SLC17A1;SLC8A1                                  |
| positive regulation of vesicle fusion                    | GO:0031340 | 4.59E-04    | ANXA1;ANXA2                                                     |
| sodium ion transmembrane transport                       | GO:0035725 | 0.001156293 | SLC13A1;SLC17A1;SLC8A1                                          |
| mitochondrial ATP synthesis coupled electron transport   | GO:0042775 | 0.00139034  | COX7B;NDUFV2;COX7C;COX6B1                                       |
| positive regulation of phagocytosis                      | GO:0050766 | 0.001452486 | PYCARD;C4A;FCER1G                                               |
| myeloid cell activation involved in immune response      | GO:0002275 | 0.001653947 | PYCARD;FCER1G                                                   |
| respiratory electron transport chain                     | GO:0022904 | 0.002005672 | COX7B;NDUFV2;COX7C;COX6B1                                       |
| interleukin-12-mediated signaling pathway                | GO:0035722 | 0.002317069 | ANXA2;GSTA2;LCP1                                                |
| cellular response to interleukin-12                      | GO:0071349 | 0.002317069 | ANXA2;GSTA2;LCP1                                                |
| hydrogen peroxide catabolic process                      | GO:0042744 | 0.00270667  | PRDX3;GPX3                                                      |
| intracellular lipid transport                            | GO:0032365 | 0.003111689 | COL4A3BP;NPC2                                                   |
| cellular response to glucocorticoid stimulus             | GO:0071385 | 0.004001047 | ANXA1;PCK1                                                      |

|                                                                                  |                    |                     |                                |
|----------------------------------------------------------------------------------|--------------------|---------------------|--------------------------------|
| anion transport                                                                  | GO:0<br>00682<br>0 | 0.004<br>01527<br>3 | SLC13A1;SLC17A1;SLC22A8        |
| nucleosome disassembly                                                           | GO:0<br>00633<br>7 | 0.004<br>99414<br>9 | SMARCD2;HMGA1                  |
| chromatin disassembly                                                            | GO:0<br>03149<br>8 | 0.004<br>99414<br>9 | SMARCD2;HMGA1                  |
| regulation of vesicle fusion                                                     | GO:0<br>03133<br>8 | 0.005<br>08613<br>9 | ANXA1;ANXA2;TBC1D13            |
| organic anion transport                                                          | GO:0<br>01571<br>1 | 0.005<br>37297<br>2 | NPC2;ALB;SLC22A8;SLC17A1       |
| hydrogen peroxide metabolic process                                              | GO:0<br>04274<br>3 | 0.005<br>52885<br>5 | PRDX3;GPX3                     |
| protein-DNA complex disassembly                                                  | GO:0<br>03298<br>6 | 0.006<br>08860<br>6 | SMARCD2;HMGA1                  |
| phagocytosis                                                                     | GO:0<br>00690<br>9 | 0.007<br>21371<br>4 | IGHM;ANXA1;PDIA6;TGM2          |
| regulation of interleukin-8 secretion                                            | GO:2<br>00048<br>2 | 0.007<br>28207<br>3 | PYCARD;ANXA1                   |
| inorganic cation transmembrane transport                                         | GO:0<br>09866<br>2 | 0.008<br>17262<br>4 | SLC13A1;SLC39A7;SLC17A1;SLC8A1 |
| positive regulation of endopeptidase activity                                    | GO:0<br>01095<br>0 | 0.008<br>57224<br>2 | PYCARD;PSME1                   |
| nitrogen compound transport                                                      | GO:0<br>07170<br>5 | 0.008<br>61729<br>4 | COL4A3BP;SLC3A1;SLC17A1        |
| negative regulation of wound healing                                             | GO:0<br>06104<br>5 | 0.009<br>25287<br>9 | PHLDB2;KNG1                    |
| L-amino acid transport                                                           | GO:0<br>01580<br>7 | 0.009<br>25287<br>9 | SLC1A1;SLC3A1                  |
| antigen processing and presentation of exogenous peptide antigen via MHC class I | GO:0<br>04259<br>0 | 0.009<br>93069<br>5 | VAMP8;FCER1G;PSME1             |
| apoptotic cell clearance                                                         | GO:0<br>04327<br>7 | 0.009<br>95684<br>3 | PDIA6;TGM2                     |
| T cell activation involved in immune response                                    | GO:0<br>00228<br>6 | 0.009<br>95684<br>3 | FCER1G;LCP1                    |
| regulation of blood coagulation                                                  | GO:0<br>03019<br>3 | 0.013<br>00045<br>3 | FCER1G;KNG1                    |
| negative regulation of secretion by cell                                         | GO:1<br>90353<br>1 | 0.013<br>00045<br>3 | VAMP8;ANXA1                    |

|                                                   |                    |                     |                                       |
|---------------------------------------------------|--------------------|---------------------|---------------------------------------|
| liver development                                 | GO:0<br>00188<br>9 | 0.013<br>81693<br>3 | PCK1;GFER                             |
| post-translational protein modification           | GO:0<br>04368<br>7 | 0.015<br>47226<br>9 | C4A;ALB;PSME1;ELOB;PDIA6;KNG1         |
| positive regulation of organelle organization     | GO:0<br>01063<br>8 | 0.015<br>51471<br>6 | ANXA1;ANXA2                           |
| epithelial cell differentiation                   | GO:0<br>03085<br>5 | 0.017<br>22579<br>9 | TAGLN;GSTA2;PCK1                      |
| sodium-independent organic anion transport        | GO:0<br>04325<br>2 | 0.019<br>16225<br>4 | ALB;SLC22A8                           |
| protein peptidyl-prolyl isomerization             | GO:0<br>00041<br>3 | 0.019<br>16225<br>4 | PPIG;PPIC                             |
| cellular protein metabolic process                | GO:0<br>04426<br>7 | 0.019<br>36303<br>9 | C4A;CALB1;ALB;MAN2B1;RRBP1;PDIA6;KNG1 |
| T cell differentiation                            | GO:0<br>03021<br>7 | 0.020<br>12513<br>4 | ANXA1;FCER1G                          |
| regulation of cellular amide metabolic process    | GO:0<br>03424<br>8 | 0.020<br>12513<br>4 | RBM3;NOLC1                            |
| acyl-CoA metabolic process                        | GO:0<br>00663<br>7 | 0.021<br>10790<br>8 | ACOT9;ACSM1                           |
| peptidyl-proline modification                     | GO:0<br>01820<br>8 | 0.022<br>11032<br>6 | PPIG;PPIC                             |
| regulation of phagocytosis                        | GO:0<br>05076<br>4 | 0.023<br>13214<br>2 | PYCARD;FCER1G                         |
| monocarboxylic acid metabolic process             | GO:0<br>03278<br>7 | 0.023<br>37909      | ACSM1;BSG;PCK1                        |
| positive regulation of transport                  | GO:0<br>05105<br>0 | 0.026<br>31154<br>1 | ANXA1;ANXA2                           |
| inorganic anion transport                         | GO:0<br>01569<br>8 | 0.026<br>31154<br>1 | SLC13A1;SLC17A1                       |
| posttranscriptional regulation of gene expression | GO:0<br>01060<br>8 | 0.026<br>31154<br>1 | RBM3;NOLC1                            |
| hexose metabolic process                          | GO:0<br>01931<br>8 | 0.027<br>40852<br>3 | MAN2B1;PCK1                           |
| metal ion homeostasis                             | GO:0<br>05506<br>5 | 0.027<br>40852<br>3 | SLC8A1;SLC12A9                        |
| sphingolipid metabolic process                    | GO:0<br>00666<br>5 | 0.028<br>06038<br>1 | COL4A3BP;GM2A;HEXB                    |

|                                                     |                    |                     |                                                      |
|-----------------------------------------------------|--------------------|---------------------|------------------------------------------------------|
| pyruvate metabolic process                          | GO:0<br>00609<br>0 | 0.028<br>52370<br>1 | BSG;PCK1                                             |
| regulation of intrinsic apoptotic signaling pathway | GO:2<br>00124<br>2 | 0.029<br>65684<br>1 | PYCARD;BCLAF1                                        |
| amino acid transport                                | GO:0<br>00686<br>5 | 0.030<br>80771      | SLC7A13;SLC3A1                                       |
| regulation of cellular protein metabolic process    | GO:0<br>03226<br>8 | 0.033<br>16171<br>6 | RBM3;NOLC1                                           |
| fatty acid oxidation                                | GO:0<br>01939<br>5 | 0.033<br>16171<br>6 | ACOX1;ACSM1                                          |
| platelet degranulation                              | GO:0<br>00257<br>6 | 0.033<br>20301<br>6 | ALB;ANXA5;KNG1                                       |
| coenzyme metabolic process                          | GO:0<br>00673<br>2 | 0.034<br>36439<br>9 | ACOT9;ACSM1                                          |
| glycosphingolipid metabolic process                 | GO:0<br>00668<br>7 | 0.038<br>07248<br>1 | GM2A;HEXB                                            |
| positive regulation of response to stimulus         | GO:0<br>04858<br>4 | 0.038<br>07248<br>1 | BCLAF1;HMGA1                                         |
| regulation of apoptotic process                     | GO:0<br>04298<br>1 | 0.039<br>66388<br>1 | PYCARD;PRDX3;BCLAF1;ANXA1;ALB;ANXA5;HS1BP3;KNG1;TGM2 |
| regulation of secretion by cell                     | GO:1<br>90353<br>0 | 0.040<br>62569<br>6 | VAMP8;ANXA1                                          |
| granulocyte chemotaxis                              | GO:0<br>07162<br>1 | 0.040<br>62569<br>6 | ANXA1;FCER1G                                         |
| organonitrogen compound catabolic process           | GO:1<br>90156<br>5 | 0.040<br>62569<br>6 | ANPEP;CTSD                                           |
| IRE1-mediated unfolded protein response             | GO:0<br>03649<br>8 | 0.041<br>92600<br>2 | KLHDC3;PDIA6                                         |
| chloride transmembrane transport                    | GO:1<br>90247<br>6 | 0.041<br>92600<br>2 | SLC1A1;SLC12A9                                       |
| regulation of cytosolic calcium ion concentration   | GO:0<br>05148<br>0 | 0.042<br>53065<br>8 | CALB1;SLC8A1;KNG1                                    |
| sterol homeostasis                                  | GO:0<br>05509<br>2 | 0.043<br>24182<br>2 | NPC2;ACSM1                                           |
| cholesterol homeostasis                             | GO:0<br>04263<br>2 | 0.043<br>24182<br>2 | NPC2;ACSM1                                           |
| positive regulation of T cell proliferation         | GO:0<br>04210<br>2 | 0.047<br>28026<br>4 | PYCARD;ANXA1                                         |

**Table S6.** Ingenuity Canonical Signaling Pathway Analysis comparison of renal proteomic responses to dehydration or cyclosporine treatment. For each defined pathway (n>2 proteins per pathway) the negative log<sub>10</sub> of the enrichment p value is given. Statistically significant pathway enrichment is observed from a log<sub>10</sub> transformed p value of >1.3.

| Canonical Signaling Pathways                                    | dehydration (-log <sub>10</sub> p value) | cyclosporine (-log <sub>10</sub> p value) |
|-----------------------------------------------------------------|------------------------------------------|-------------------------------------------|
| Acute Phase Response Signaling                                  | 5.21025649                               | 1.416069508                               |
| Chondroitin Sulfate Degradation (Metazoa)                       | 1.213230265                              | 2.693091184                               |
| Dermatan Sulfate Degradation (Metazoa)                          | 1.187739513                              | 2.639923278                               |
| Mitochondrial Dysfunction                                       | 0.307983671                              | 2.226059687                               |
| Oxidative Phosphorylation                                       | 0.455621228                              | 1.958081763                               |
| Glutathione Redox Reactions I                                   | 0                                        | 2.340870876                               |
| Glutathione-mediated Detoxification                             | 0                                        | 2.095781672                               |
| Taurine Biosynthesis                                            | 0                                        | 2.075300887                               |
| Acyl-CoA Hydrolysis                                             | 0                                        | 1.306174917                               |
| Apelin Adipocyte Signaling Pathway                              | 0                                        | 1.347961555                               |
| Ketogenesis                                                     | 0                                        | 1.383555939                               |
| Ketolysis                                                       | 0                                        | 1.383555939                               |
| Thyroid Hormone Biosynthesis                                    | 0                                        | 1.900114873                               |
| Heme Degradation                                                | 0                                        | 1.776080778                               |
| Aryl Hydrocarbon Receptor Signaling                             | 0                                        | 1.653602622                               |
| Unfolded protein response                                       | 0                                        | 1.632046506                               |
| Glutamate Receptor Signaling                                    | 0                                        | 1.617708867                               |
| NAD Phosphorylation and Dephosphorylation                       | 2.934643497                              | 1.272312016                               |
| Purine Nucleotides De Novo Biosynthesis II                      | 3.0841511                                | 0                                         |
| NAD Salvage Pathway II                                          | 3.842878133                              | 0                                         |
| Selenocysteine Biosynthesis II (Archaea and Eukaryotes)         | 3.642856116                              | 0                                         |
| LXR/RXR Activation                                              | 1.914958228                              | 1.836442045                               |
| Calcium Transport I                                             | 1.412310092                              | 1.383555939                               |
| Glucose and Glucose-1-phosphate Degradation                     | 1.371758746                              | 1.343063668                               |
| FXR/RXR Activation                                              | 1.867847524                              | 1.00458504                                |
| Clathrin-mediated Endocytosis Signaling                         | 1.31465597                               | 0.663584224                               |
| Calcium-induced T Lymphocyte Apoptosis                          | 1.553778414                              | 0.613503175                               |
| Role of NFAT in Regulation of the Immune Response               | 2.153634633                              | 0.254158085                               |
| α-Adrenergic Signaling                                          | 2.227024973                              | 0.487746813                               |
| IL-4 Signaling                                                  | 2.214160445                              | 0.483952035                               |
| CD28 Signaling in T Helper Cells                                | 1.814047652                              | 0.36836186                                |
| Fc Epsilon RI Signaling                                         | 1.877097794                              | 0.38622327                                |
| Natural Killer Cell Signaling                                   | 1.849595214                              | 0.378413731                               |
| D-myo-inositol (1,4,5)-trisphosphate Degradation                | 2.647601788                              | 0                                         |
| PDGF Signaling                                                  | 2.188879623                              | 0                                         |
| IL-17 Signaling                                                 | 2.253218742                              | 0                                         |
| Non-Small Cell Lung Cancer Signaling                            | 2.364729419                              | 0                                         |
| Aldosterone Signaling in Epithelial Cells                       | 2.356736838                              | 0                                         |
| Superpathway of D-myo-inositol (1,4,5)-trisphosphate Metabolism | 2.398039579                              | 0                                         |
| GDNF Family Ligand-Receptor Interactions                        | 2.37949331                               | 0                                         |
| Cholecystokinin/Gastrin-mediated Signaling                      | 2.059546216                              | 0                                         |
| tRNA Charging                                                   | 1.985717667                              | 0                                         |
| Oncostatin M Signaling                                          | 1.964544462                              | 0                                         |
| EIF2 Signaling                                                  | 1.905434152                              | 0                                         |
| Inosine-5'-phosphate Biosynthesis II                            | 1.929284759                              | 0                                         |

|                                                                      |             |             |
|----------------------------------------------------------------------|-------------|-------------|
| Tetrahydrobiopterin Biosynthesis I                                   | 1.929284759 | 0           |
| Tetrahydrobiopterin Biosynthesis II                                  | 1.929284759 | 0           |
| IL-6 Signaling                                                       | 1.796732956 | 0           |
| UVC-Induced MAPK Signaling                                           | 1.796145603 | 0           |
| Iron homeostasis signaling pathway                                   | 1.771309103 | 0           |
| CCR3 Signaling in Eosinophils                                        | 1.779712082 | 0           |
| PI3K Signaling in B Lymphocytes                                      | 1.779712082 | 0           |
| Synaptic Long Term Potentiation                                      | 1.867847524 | 0           |
| PTEN Signaling                                                       | 1.886432598 | 0           |
| PI3K/AKT Signaling                                                   | 1.831665239 | 0           |
| fMLP Signaling in Neutrophils                                        | 1.840590567 | 0           |
| Renin-Angiotensin Signaling                                          | 1.849595214 | 0           |
| Thyroid Cancer Signaling                                             | 1.848310929 | 0           |
| NRF2-mediated Oxidative Stress Response                              | 1.351314379 | 0.242735748 |
| Cancer Drug Resistance By Drug Efflux                                | 1.701420805 | 0           |
| Insulin Receptor Signaling                                           | 1.698724324 | 0           |
| Melanoma Signaling                                                   | 1.617278519 | 0           |
| Regulation of eIF4 and p70S6K Signaling                              | 1.574829684 | 0           |
| Gαq Signaling                                                        | 1.588600801 | 0           |
| Glioblastoma Multiforme Signaling                                    | 1.541256436 | 0           |
| Thrombopoietin Signaling                                             | 1.495347034 | 0           |
| Endometrial Cancer Signaling                                         | 1.506663421 | 0           |
| IL-2 Signaling                                                       | 1.506663421 | 0           |
| CNTF Signaling                                                       | 1.518159341 | 0           |
| GNRH Signaling                                                       | 1.521675125 | 0           |
| CXCR4 Signaling                                                      | 1.521675125 | 0           |
| Urate Biosynthesis/Inosine 5'-phosphate Degradation                  | 1.300889182 | 0           |
| Adrenomedullin signaling pathway                                     | 1.351314379 | 0           |
| Gap Junction Signaling                                               | 1.345982023 | 0           |
| Regulation of IL-2 Expression in Activated and Anergic T Lymphocytes | 1.344138596 | 0           |
| Renal Cell Carcinoma Signaling                                       | 1.326228625 | 0           |
| Erythropoietin Signaling                                             | 1.335125727 | 0           |
| Guanosine Nucleotides Degradation III                                | 1.334811    | 0           |
| JAK/Stat Signaling                                                   | 1.317444649 | 0           |
| Prolactin Signaling                                                  | 1.317444649 | 0           |
| IL-3 Signaling                                                       | 1.317444649 | 0           |
| Synaptic Long Term Depression                                        | 1.465298981 | 0           |
| Agrin Interactions at Neuromuscular Junction                         | 1.451778556 | 0           |
| ErbB2-ErbB3 Signaling                                                | 1.451778556 | 0           |
| Neurotrophin/TRK Signaling                                           | 1.371899613 | 0           |
| Antiproliferative Role of Somatostatin Receptor 2                    | 1.391038579 | 0           |
| B Cell Receptor Signaling                                            | 1.384006496 | 0           |
| IL-15 Signaling                                                      | 1.38140387  | 0           |
| BMP signaling pathway                                                | 1.38140387  | 0           |
| Chemokine Signaling                                                  | 1.430949256 | 0           |
| Role of MAPK Signaling in the Pathogenesis of Influenza              | 1.420758756 | 0           |
| ErbB4 Signaling                                                      | 1.420758756 | 0           |
| GM-CSF Signaling                                                     | 1.410712562 | 0           |
| SPINK1 General Cancer Pathway                                        | 1.410712562 | 0           |

**Table S7.** Overlapping of dehydration- and cyclosporine exposure DEPs with a literature-derived protein list associated with ‘dehydration’; ‘cyclosporine’ ‘lysosome’; ‘lysosomal storage disease’; ‘fibrosis’ ‘senescence’; and ‘mitochondria’ compared to a randomly appeared protein list (n=112). Significance is asserted as follows  $P \leq 0.01$ (\*\*);  $P \leq 0.001$ (\*\*\*).

|                           | Benchmarked associated proteins | Overlapping with signature list |             |
|---------------------------|---------------------------------|---------------------------------|-------------|
|                           |                                 | Cyclosporine                    | Dehydration |
| Dehydration               | 603                             | 3                               | 11(**)      |
| Cyclosporine              | 305                             | 8(***)                          | 3           |
| Lysosome                  | 1668                            | 20(***)                         | 14(**)      |
| Lysosomal Storage Disease | 654                             | 11(***)                         | 5           |
| Fibrosis                  | 1314                            | 16(***)                         | 7           |
| Senescence                | 500                             | 10(***)                         | 4(**)       |
| Mitochondria              | 2642                            | 27(***)                         | 20(**)      |

**Table S8.** Ingenuity Disease/Bio-Function comparison analysis of renal proteomic responses to dehydration or cyclosporine treatment. For each IPA-defined Disease/Bio-Function (n>2 proteins per pathway,  $p < 0.05$  for enrichment) the predicted Disease/Bio-Function z-score is given. Functions that are considered to be activated are given a positive z score while those considered to be inhibited are given a negative z score.

| Disease/Bio-Function                 | dehydration IPA z score | cyclosporine IPA z score |
|--------------------------------------|-------------------------|--------------------------|
| Apoptosis                            | 0.349                   | 2.538                    |
| Cell death                           | 0.262                   | 2.215                    |
| Necrosis                             | 0                       | 2.012                    |
| Apoptosis of tumor cell lines        | 0                       | 1.673                    |
| Synthesis of reactive oxygen species | -0.095                  | 1.57                     |
| Phagocytosis of cells                | 0                       | 1.519                    |
| Engulfment of cells                  | 0                       | 1.392                    |
| Cell death of myeloid cells          | 0                       | 1.161                    |
| Proliferation of immune cells        | 0                       | 1.109                    |
| Cell death of phagocytes             | 0                       | 1.024                    |
| Fatty acid metabolism                | 0                       | -0.034                   |
| Glucose metabolism disorder          | 0                       | -0.069                   |
| Synthesis of eicosanoid              | 0                       | -0.318                   |
| Concentration of lipid               | 0                       | -0.348                   |
| Uptake of D-hexose                   | 0                       | -0.447                   |
| Synthesis of lipid                   | 0                       | -0.588                   |
| Synthesis of fatty acid              | 0                       | -0.607                   |
| Quantity of steroid                  | 0                       | -0.895                   |
| Disorder of lipid metabolism         | 0                       | -1.131                   |
| Accumulation of lipid                | 0                       | -2.181                   |

**Table S9.** Ingenuity Toxicity Function analysis of renal proteomic responses to dehydration. For each IPA-defined Toxicity Function (n>2 proteins per pathway) the negative log<sub>10</sub> of the enrichment p value is given. Statistically significant pathway enrichment is observed from a log<sub>10</sub> transformed p value of >1.3.

| Toxicity Function                    | negative log <sub>10</sub> p value |
|--------------------------------------|------------------------------------|
| Stage II acute myocardial infarction | 4.815308569                        |
| Liver cancer                         | 3.348721986                        |
| Renal Damage                         | 2.850780887                        |
| Nephrosis                            | 2.698970004                        |
| Injury of kidney                     | 2.552841969                        |
| Liver carcinoma                      | 2.41453927                         |
| Proliferation of liver cancer cells  | 2.296708622                        |
| Apoptosis of tubular cells           | 1.962573502                        |
| Apoptosis of cardiomyocytes          | 1.879426069                        |
| Left ventricular dilation            | 1.812479279                        |

**Table S10.** Ingenuity Toxicity Function analysis of renal proteomic responses to cyclosporine treatment. For each IPA-defined Toxicity Function (n>2 proteins per pathway) the negative log<sub>10</sub> of the enrichment p value is given. Statistically significant pathway enrichment is observed from a log<sub>10</sub> transformed p value of >1.3.

| Toxicity Function                                  | negative log <sub>10</sub> p value |
|----------------------------------------------------|------------------------------------|
| Proximal tubular toxicity                          | 5.57024772                         |
| Microvesicular hepatic steatosis                   | 3.863279433                        |
| Cholestasis                                        | 3.038578906                        |
| Acute kidney injury                                | 2.76700389                         |
| Damage of kidney                                   | 2.754487332                        |
| Hyperbilirubinemia                                 | 2.455931956                        |
| Dysfunction of kidney                              | 2.341035157                        |
| Proliferation of liver cancer cells                | 2.240332155                        |
| Hepatocellular carcinoma                           | 1.804100348                        |
| Hepatitis B virus-related hepatocellular carcinoma | 1.793174124                        |



**Table S11.** Heatmaps of Gene Symbol-Biomedical Text word correlations using input DEP lists from the dehydration cohort showing associated text matrices revealing a clustering of proteins with biomedical terms.

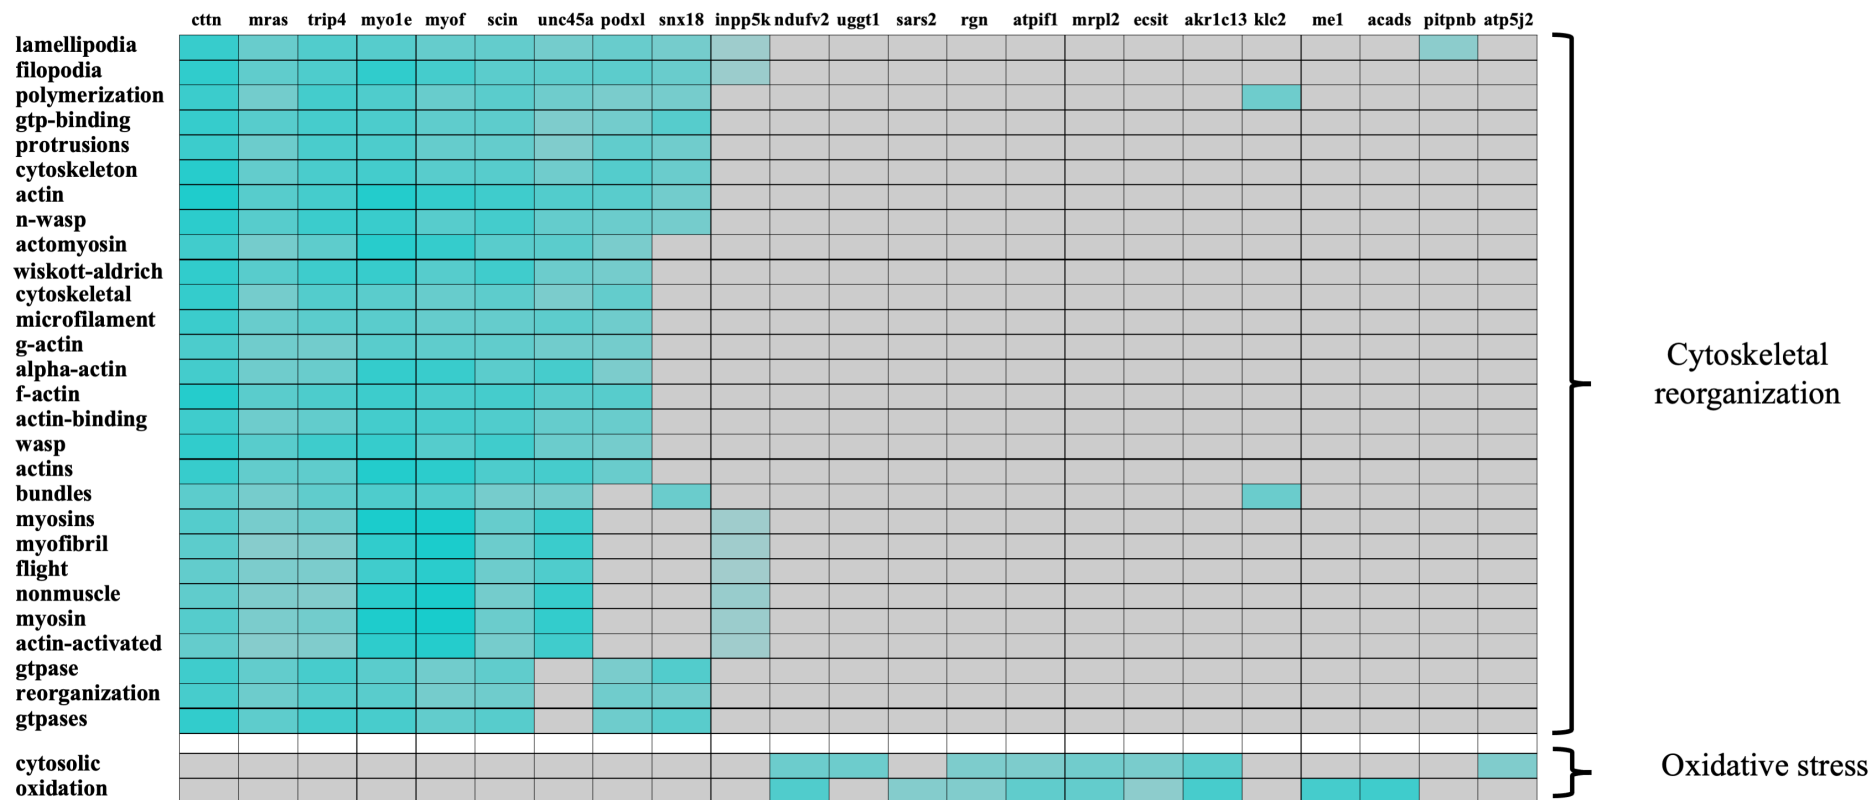

**Table S12.** Heatmaps of Gene Symbol-Biomedical Text word correlations using input DEP lists from the cyclosporine cohort showing associated text matrices revealing a clustering of proteins with biomedical terms.

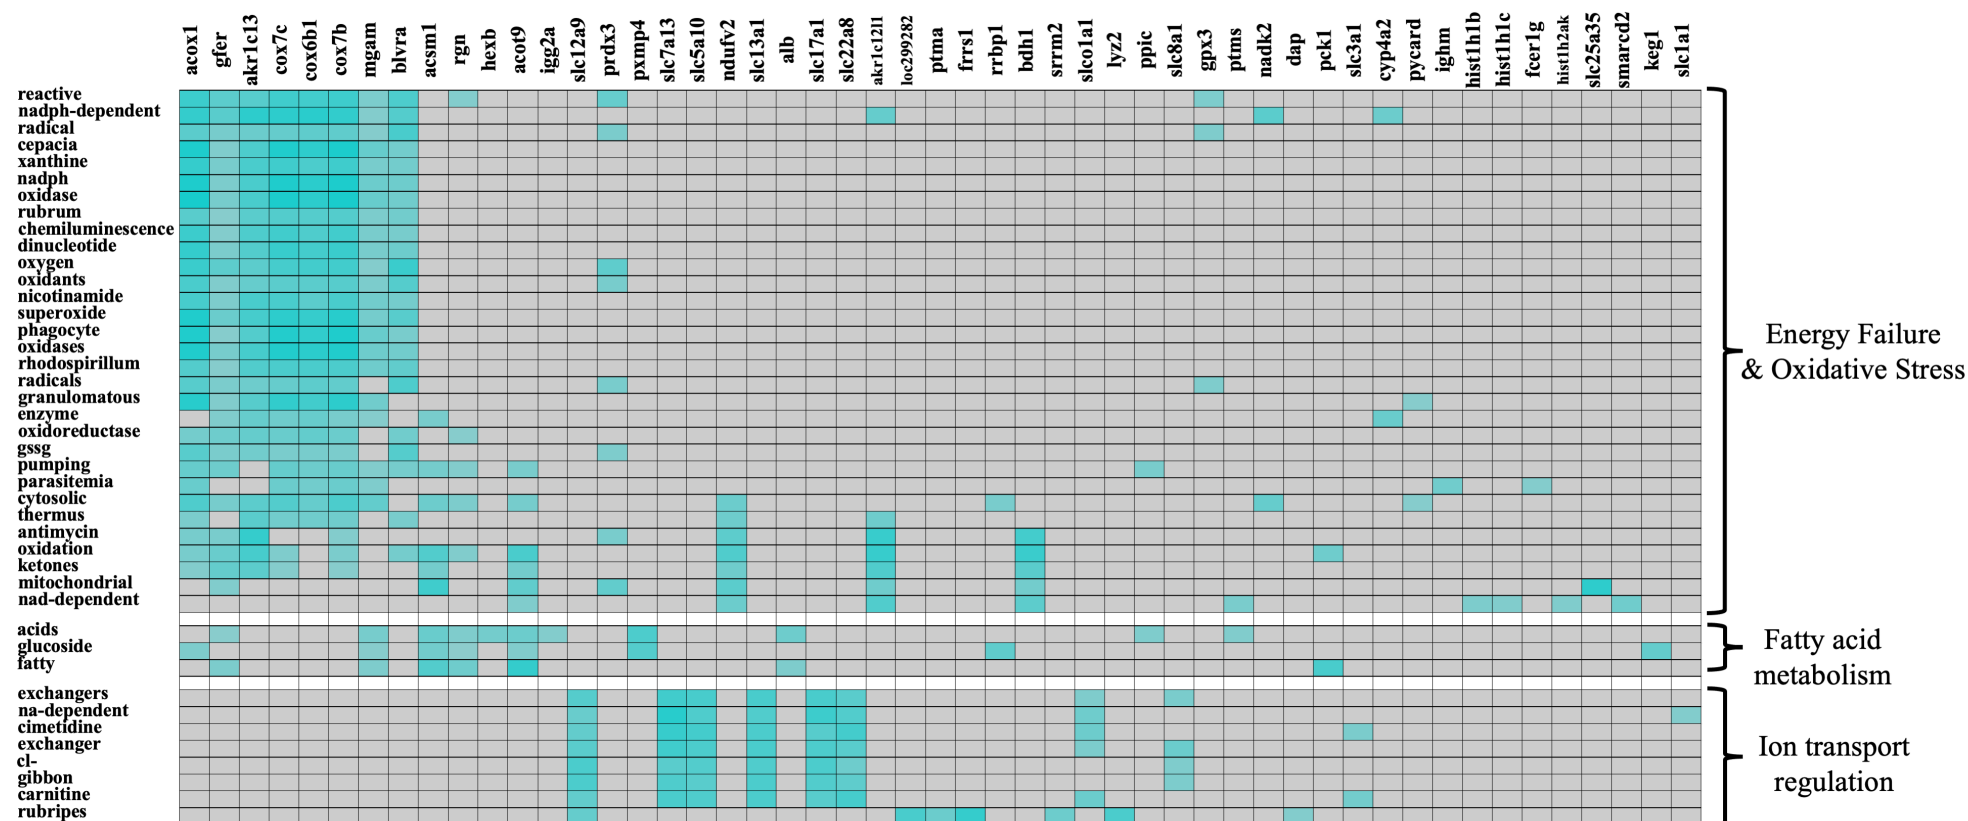

Supplement: 41598_2023_43567_MOESM2_ESM.pdf [file 41598_2023_43567_MOESM2_ESM.pdf]
